# Supplementary material
Source: MDPI journal article supplement (https://www.mdpi.com/2079-6412/11/8/892)
Supplement: s1 [file s1]

# Supplementary Materials: Chemical Vapor Deposition of Graphene on Cu-Ni Alloys: The Impact of Carbon Solubility

Samir H. Al-Hilfi <sup>1,2,\*</sup>, Ian A. Kinloch <sup>3</sup> and Brian Derby <sup>2</sup>

<sup>1</sup> School of Applied Sciences, University of Technology, Baghdad 964, Iraq

<sup>2</sup> Department of Materials, The University of Manchester, Oxford Road, Manchester M13 9PL, UK; Brian.Derby@manchester.ac.uk

<sup>3</sup> National Graphene Institute, Henry Royce Institute and Department of Materials, The University of Manchester, Oxford Road, Manchester M13 9PL, UK; Ian.Kinloch@manchester.ac.uk

\* Correspondence: 100119@uotechnology.edu.iq

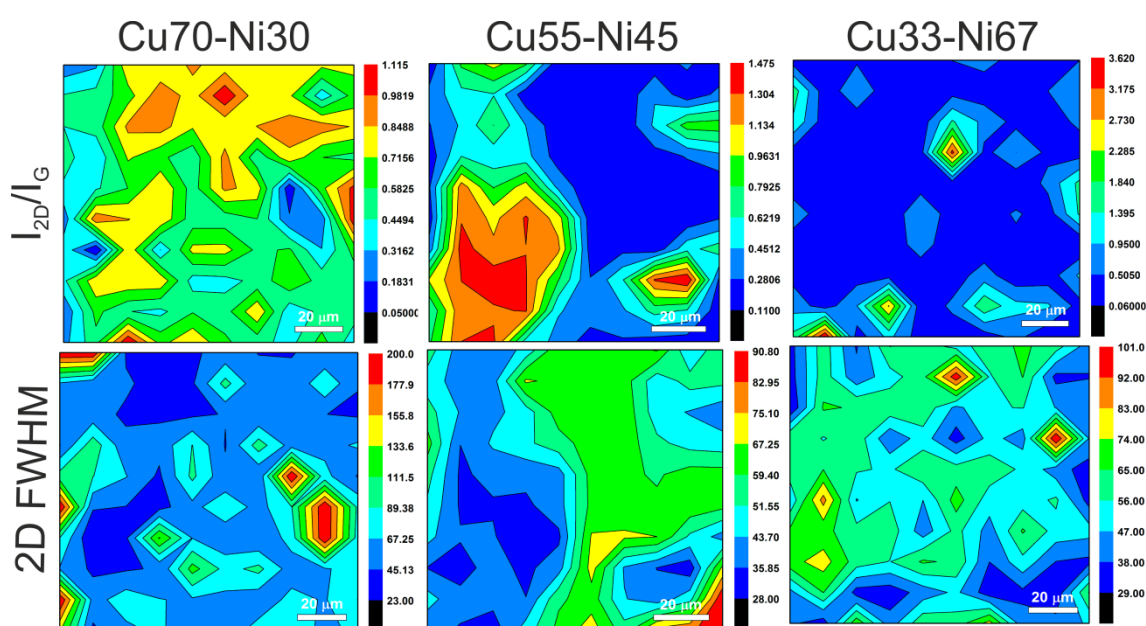

**Figure S1.** Raman  $I_{2D}/I_G$  and 2D band FWHM Cu-Ni alloys. Growth conditions were 1000 °C growth temperature, 0.65 mbar growth pressure, and fast cooling rate.

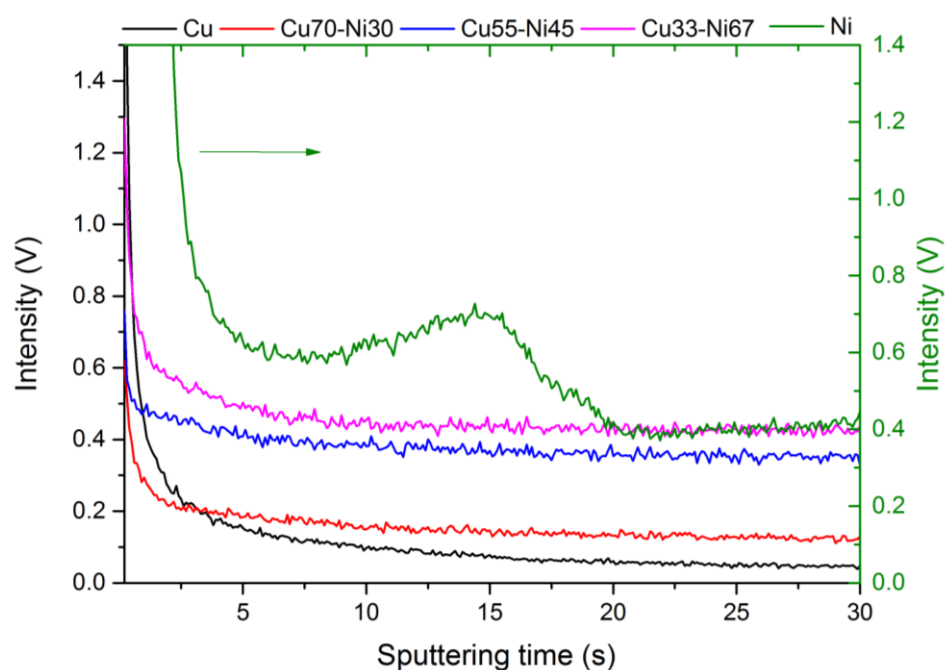

**Figure S2.** The GDOES C intensity vs sputtering time for the Cu-Ni alloys. Growth conditions are 1000 °C growth temperature, 0.1 mbar growth pressure, fast cooling rate and growth time as stated in Figure 5.

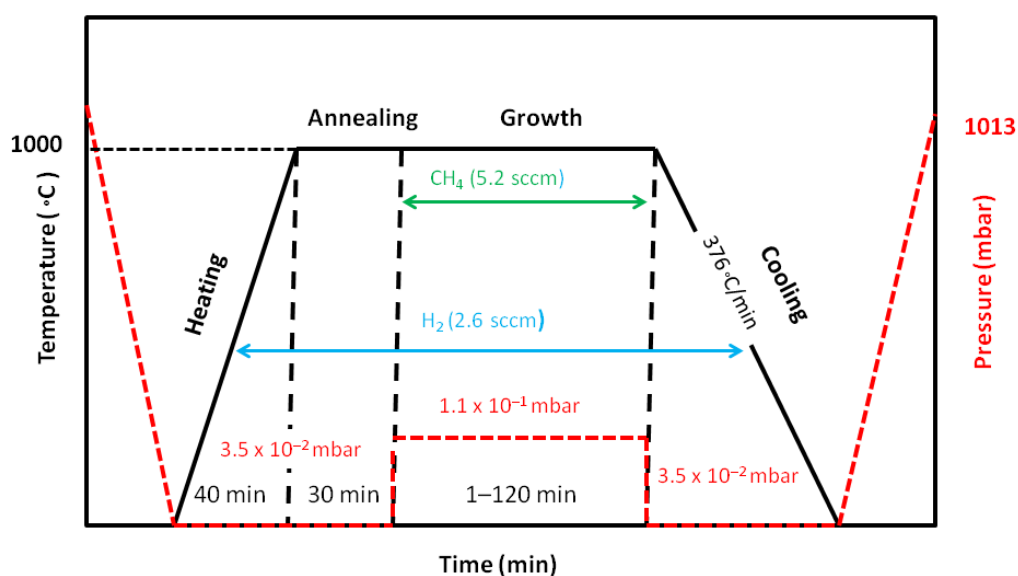

**Figure S3.** Schematic illustrating the experimental procedure used for the CVD growth process.

**Table S1.** Substrate specifications used in this work.

| Substrate | Purity | Typical Analysis (ppm)                                                           | Supplier   | Note      |
|-----------|--------|----------------------------------------------------------------------------------|------------|-----------|
| Nickel    | 99.98% | Co 8, Cr 8, Cu 10, Fe 10, Mg 10, Mn 10, Si 8, Ti 10, C 70, S 10                  | Goodfellow | Annealed  |
| Copper    | 99.99% | Ag 70, Al 1, Bi 1, Ca 1, Cr <1, Fe 2, Mg 1, Mn <1, Na <1, Ni 2, Pb 2, Si 2, Sn 1 | Goodfellow | As rolled |
| Cu70/Ni30 | -      | Cu 67.3%, Ni 31.0%, Mn 1.0%, Fe 0.7%.                                            | Goodfellow | As rolled |

---

|           |   |                                         |            |           |
|-----------|---|-----------------------------------------|------------|-----------|
| Cu55/Ni45 | - | Fe 2500, Mn 7500, Ni 45%, Cu<br>balance | Goodfellow | As rolled |
| Cu33/Ni67 | - | -                                       | Alfa Aesar | -         |

---
